# Supplementary material
Source: PubMed Central journal article supplement (PMC11001211)

**Figure S1.** Beta-lactam allergy interview questions.

**What antibiotic caused the reaction?**

- Penicillin
- Amoxicillin or amoxicillin-clavulanate
- Ampicillin or ampicillin-sulbactam
- Piperacillin or piperacillin-tazobactam
- Nafcillin, oxacillin, dicloxacillin
- Cephalosporin \_\_\_\_\_

■ Examples: cephalexin (Keflex®), cefdinir (Omnicef®), cefpodoxime (Vantin®), cefixime (Suprax®), ceftriaxone (Rocephin®), cefepime (Maxipime®)

- Aztreonam
- Carbapenem \_\_\_\_\_
- Other \_\_\_\_\_

**What was/were the reaction/s?**

- No reaction – family history of penicillin allergy
- Unknown reaction
- Nausea, vomiting, abdominal pain or diarrhea alone (no other allergic symptoms)
- Headache or fatigue alone (no other allergic symptoms)
- Minor rash
- Itching (pruritus)
- Hives
- Lesions or ulcers involving the lips, mouth, or eyes or peeling of the skin
- Involvement of the kidney or liver
- Anemia or low blood counts
- Joint pains/swelling and fevers or “serum sickness”
- Immediate respiratory symptoms (such as wheezing, cough, trouble breathing)
- Immediate swelling of the lips or tongue
- Hypotension
- Anaphylaxis
- “Steven-Johnson syndrome (SJS),” “toxic epidermal necrolysis (TEN),” or “drug rash with eosinophilia and systemic symptoms (DRESS)”
- Other \_\_\_\_\_

**How long ago did the reaction occur?**

- Less than 1 year ago
- 1–5 years ago
- 6–10 years ago
- Greater than 10 years ago

**How long after first taking the antibiotic did the reaction occur?**

- Within 1 hour of first dose
- Between 1 hour and 24 hours of first dose
- Greater than 24 hours after first dose
- Other/unknown

**Figure S1.** Beta-lactam allergy interview questions.

**How was the reaction treated? (if applicable)**

- Resolved without any intervention or medication
- Resolved with medication
  - o Medication(s): \_\_\_\_\_
- Epinephrine administration greater than 24 hours after first dose

**How long did it take for the reaction to resolve? (if applicable)**

- Within 1 hour
- Between 1 hour and 24 hours
- Greater than 24 hours

**Did the patient have to receive medical care from any of the following for the reaction? (if applicable)**

- Pediatrician's office
- Allergist's office
- Urgent Care or emergency room
- Overnight hospitalization
- None of the above

**Have you ever taken any antibiotics since the reaction? If so, which antibiotics?**

- Yes
  - o Antibiotic(s): \_\_\_\_\_

■ Examples: amoxicillin (Amoxil®), amoxicillin/clavulanic acid (Augmentin®), penicillin (Pen-VK®), cephalexin (Keflex®)

- No

**Figure S2.** Beta-lactam allergy de-labeling protocol algorithm.

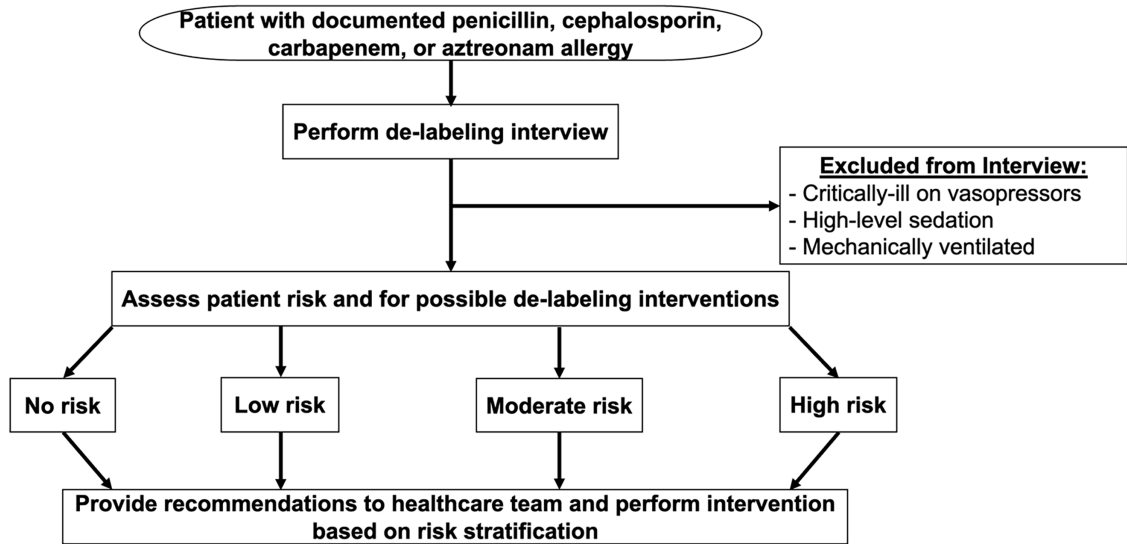

Supplement: i2331-348X-29-2-169_s01.pdf [file i2331-348X-29-2-169_s01.pdf]
